# Supplementary material for: Ptf1a inactivation in adult pancreatic acinar cells causes apoptosis through activation of the endoplasmic reticulum stress pathway
Source: PubMed Central journal article supplement (PMC6202406; doi:10.1038/s41598-018-34093-4), 2018-10-25
Supplement: 41598_2018_34093_MOESM1_ESM.pdf [file 41598_2018_34093_MOESM1_ESM.pdf]

## Supplementary Information

### ***Ptfla* inactivation in adult pancreatic acinar cells causes apoptosis through activation of the endoplasmic reticulum stress pathway**

Morito Sakikubo, Kenichiro Furuyama, Masashi Horiguchi, Shinichi Hosokawa, Yoshiki Aoyama, Kunihiko Tsuboi, Toshihiko Goto, Koji Hirata, Toshihiko Masui, Yuval Dor, Tomoyuki Fujiyama, Mikio Hoshino, Shinji Uemoto and Yoshiya Kawaguchi

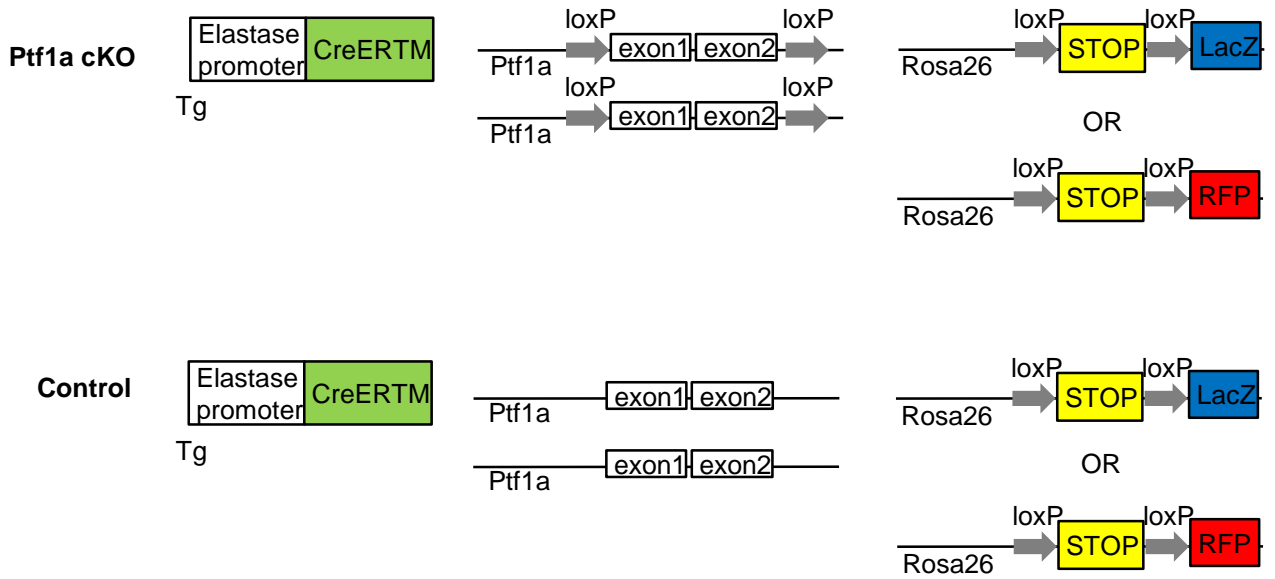

**Supplementary Figure S1. Scheme of mouse breeding.**

For lineage tracing, we chose *Rosa26-LacZ* (*Rosa26R*) or *Rosa26-RFP* mice.

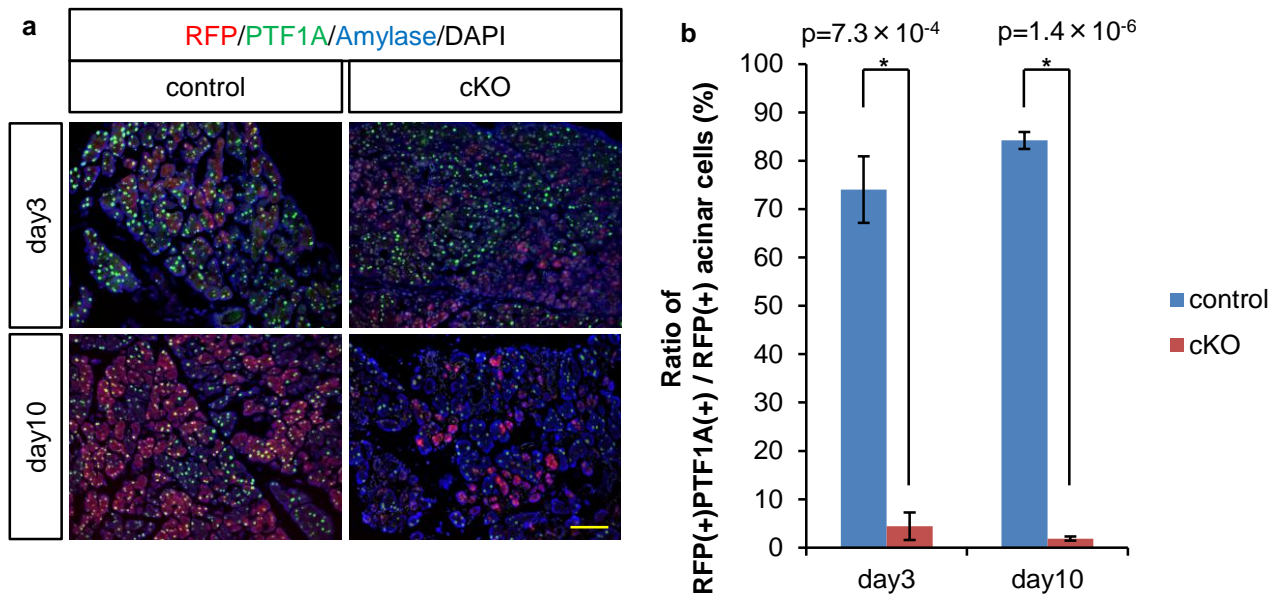

**Supplementary Figure S2. Evaluation of *Ptf1a*-deleted acinar cells.**

(a) Representative figures of control and *Ptf1a* cKO mice on days 3 and 10 stained by PTF1A, Amylase and DAPI with RFP fluorescence. (b) The ratio of RFP(+)/PTF1A(+) / RFP(+) acinar cells. control, n = 3; *Ptf1a* cKO, n = 3. Scale bar = 100  $\mu$ m. \*P<0.05.

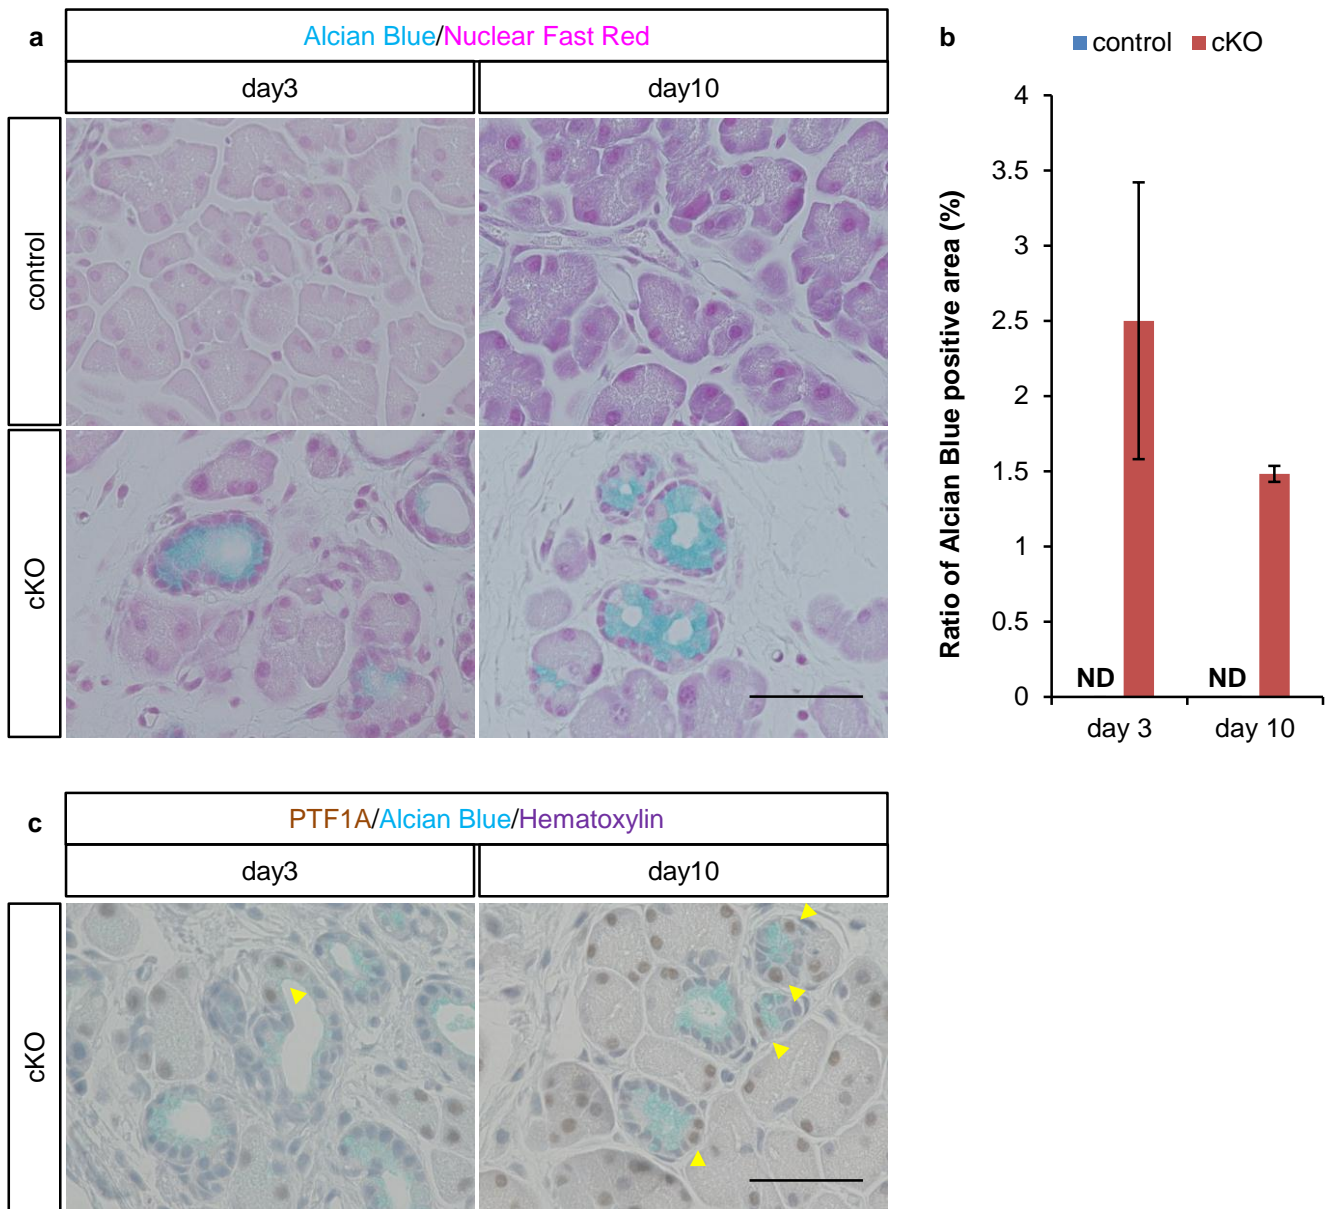

**Supplementary Figure S3. Acinar-to-ductal metaplasia (ADM) in Ptf1a cKO mice.**

(a) Representative figures of control and Ptf1a cKO mice on days 3 and 10 stained by alcian blue and Nuclear Fast Red. (b) Ratio of alcian blue positive area per pancreas. ADM were detected in Ptf1a cKO mice but not in control mice. control, n = 3; Ptf1a cKO, n = 3. (c) PTF1A positive cells (arrowheads) were rare in the alcian blue positive cells in Ptf1a cKO mice. We found 9 fields with PTF1A positive cells from a total of 2,381 fields counted in Ptf1a cKO mice on day 3 (n = 3) and 3 fields from a total of 2,758 fields in Ptf1a cKO mice on day 10 (n = 3). Scale bars = 50  $\mu$ m.

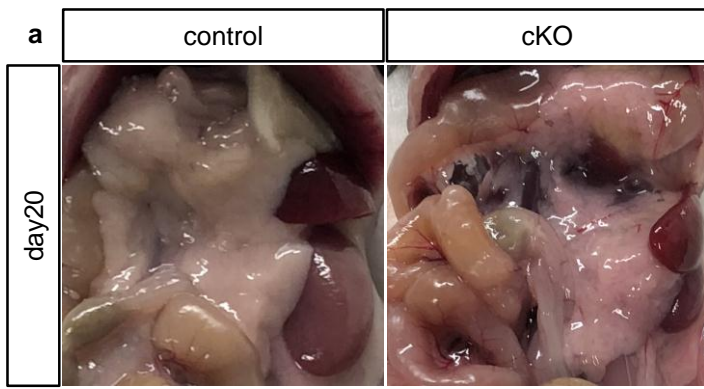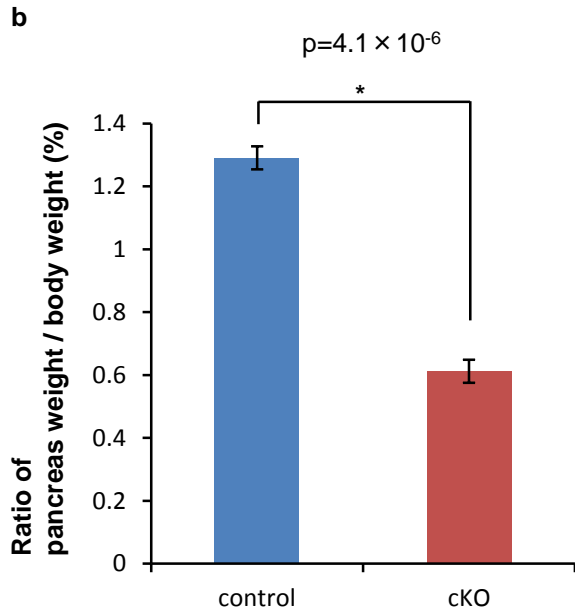

**Supplementary Figure S4. Pancreas size did not recover in Ptf1a cKO mice on day 20.**

(a) Representative figures of control and Ptf1a cKO mice on day 20. (b) Relative pancreatic weight per body weight. control, n = 5; Ptf1a cKO, n = 4.

For Figure 4a

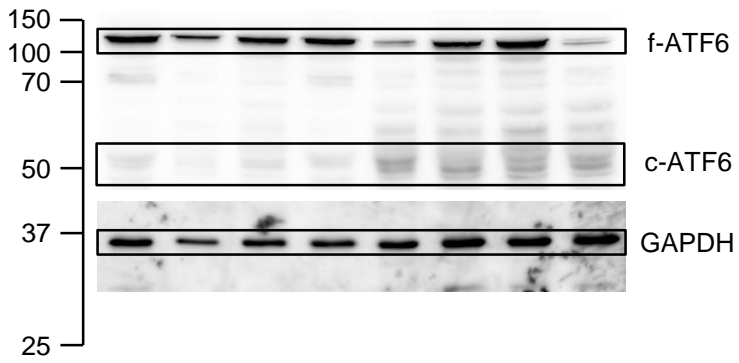

For Figure 4d

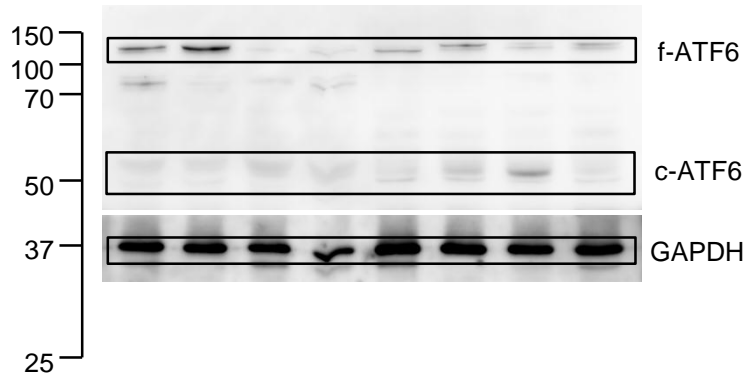

**Supplementary Figure S5. Scanned images of Western blotting.**

Approximate regions used for figures are marked with rectangles, and molecular sizes are indicated in kDa (based on prestained protein markers).

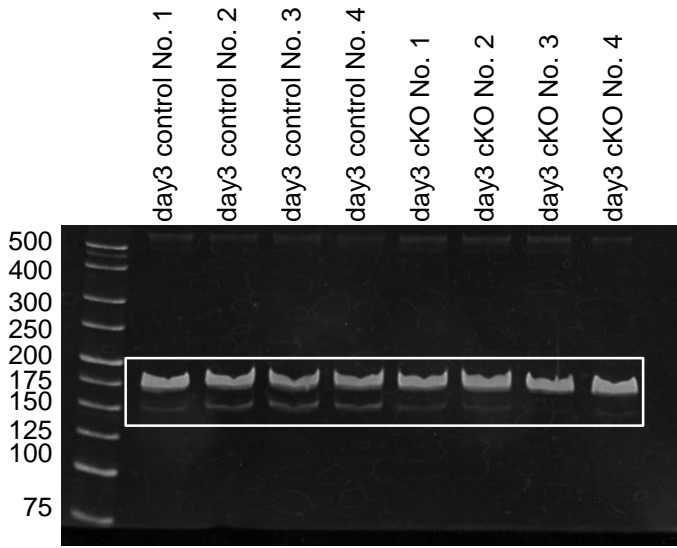

For Figure 5a

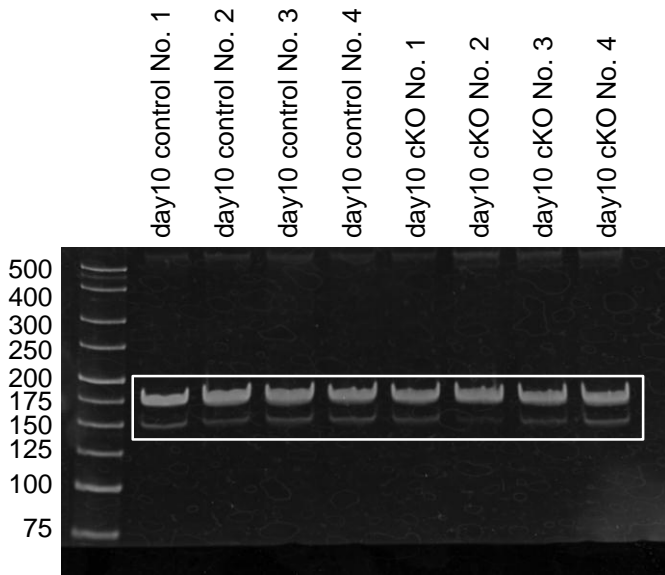

For Figure 5c

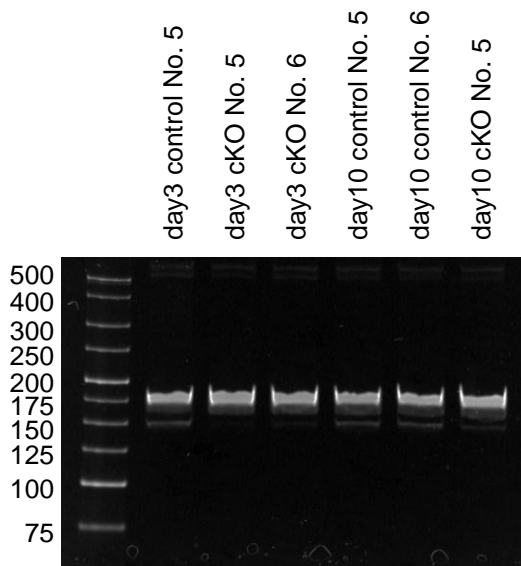

**Supplementary Figure S6. Scanned images of electrophoresis gels.**

Approximate regions used for figures are marked with rectangles, and molecular sizes are indicated in base pairs.

| Primary antibodies | Species | Dilution                            | Suppliers & Codes  |
|--------------------|---------|-------------------------------------|--------------------|
| BrdU               | Mouse   | 1:200                               | Dako<br>M0744      |
| Amylase            | Rabbit  | 1:1000                              | Sigma<br>A8273     |
| Ptf1a              | Rabbit  | 1:5000(frozen)<br>1:10000(paraffin) | M. Hoshino<br>NCNP |
| ATF4               | Rabbit  | 1:500                               | CST<br>11815       |
| CHOP               | Mouse   | 1:5000                              | CST<br>2895        |

**Supplementary Table S1.**

**Primary antibodies used in immunohistochemistry and/or immunofluorescence.**

| Secondary antibodies | Species             | Dilution     | Suppliers & Codes              |
|----------------------|---------------------|--------------|--------------------------------|
| Mouse IgG            | Horse<br>HRP linked | Ready to use | Vector Laboratories<br>MP-7422 |
| Rabbit IgG           | Horse<br>HRP linked | Ready to use | Vector Laboratories<br>MP-7401 |

**Supplementary Table S2.**

**Secondary antibodies used in immunohistochemistry and/or immunofluorescence.**

| Primary antibodies | Species | Dilution | Suppliers & Codes      |
|--------------------|---------|----------|------------------------|
| ATF6               | Mouse   | 1:200    | SantaCruz<br>sc-166659 |
| GAPDH              | Rabbit  | 1:1000   | SantaCruz<br>sc-25778  |

**Supplementary Table S3. Primary antibodies used in western blotting.**

| Secondary antibodies | Species              | Dilution | Suppliers & Codes |
|----------------------|----------------------|----------|-------------------|
| Mouse IgG            | Sheep<br>HRP linked  | 1:5000   | GE<br>NA9310      |
| Rabbit IgG           | Donkey<br>HRP linked | 1:5000   | GE<br>NA9340      |

**Supplementary Table S4. Secondary antibodies used in western blotting.**
